# Supplementary material
Source: PubMed Central journal article supplement (PMC7539766)
Supplement: ajcr0010-2946-f3.pdf [file ajcr0010-2946-f3.pdf]

## Anti-PD-1 antibody SHR-1210 plus apatinib for metastatic colorectal cancer

**Table S1.** Summary of dose adjustment events

| Number | Cause of adjustment      | Adjustment scheme | Grade 3 AE before adjustment (YES/NO) | Grade 3 AE after adjustment (YES/NO) |
|--------|--------------------------|-------------------|---------------------------------------|--------------------------------------|
| 1      | Grade 3 Hypertension     | Apatinib 250 mg/d | YES                                   | NO                                   |
| 2      | Grade 3 thrombocytopenia | Apatinib 250 mg/d | YES                                   | NO                                   |
| 3      | Grade 2 HSF              | Apatinib 250 mg/d | NO                                    | YES                                  |
| 4      | Grade 3 HSF              | Apatinib 250 mg/d | YES                                   | YES                                  |

Abbreviations: HSF, hand-foot syndrome; AE, adverse event.

**Table S2.** The characteristics of patient who had stable disease for 8.0 months

|                                                |                     |
|------------------------------------------------|---------------------|
| Age (years)                                    | 66                  |
| Sex                                            | Women               |
| ECOG                                           | 0                   |
| Diagnosis                                      | Sigmoid Cancer      |
| Differentiation                                | Medium              |
| No. of metastatic sites                        | 1                   |
| Metastatic organ                               | Peritoneum          |
| RAS                                            | Mutation            |
| BRAF                                           | Wild type           |
| TMB (mutations/MB)                             | 15.31               |
| Surgical history                               | Yes                 |
| No. of previous chemotherapy lines             | 2                   |
| Bevacizumab prior to apatinib                  | Yes                 |
| The cause of apatinib reduction (from cycle 2) | Grade 3 HSF         |
| The cause of apatinib interruption             | Grade 3 proteinuria |

Abbreviations: TMB, tumor mutational burden; HSF, hand-foot syndrome. Note: The patient interrupted apatinib for more than 28 days due to grade 3 proteinuria, and the treatment of apatinib was discontinued from cycle 12.

Anti-PD-1 antibody SHR-1210 plus apatinib for metastatic colorectal cancer

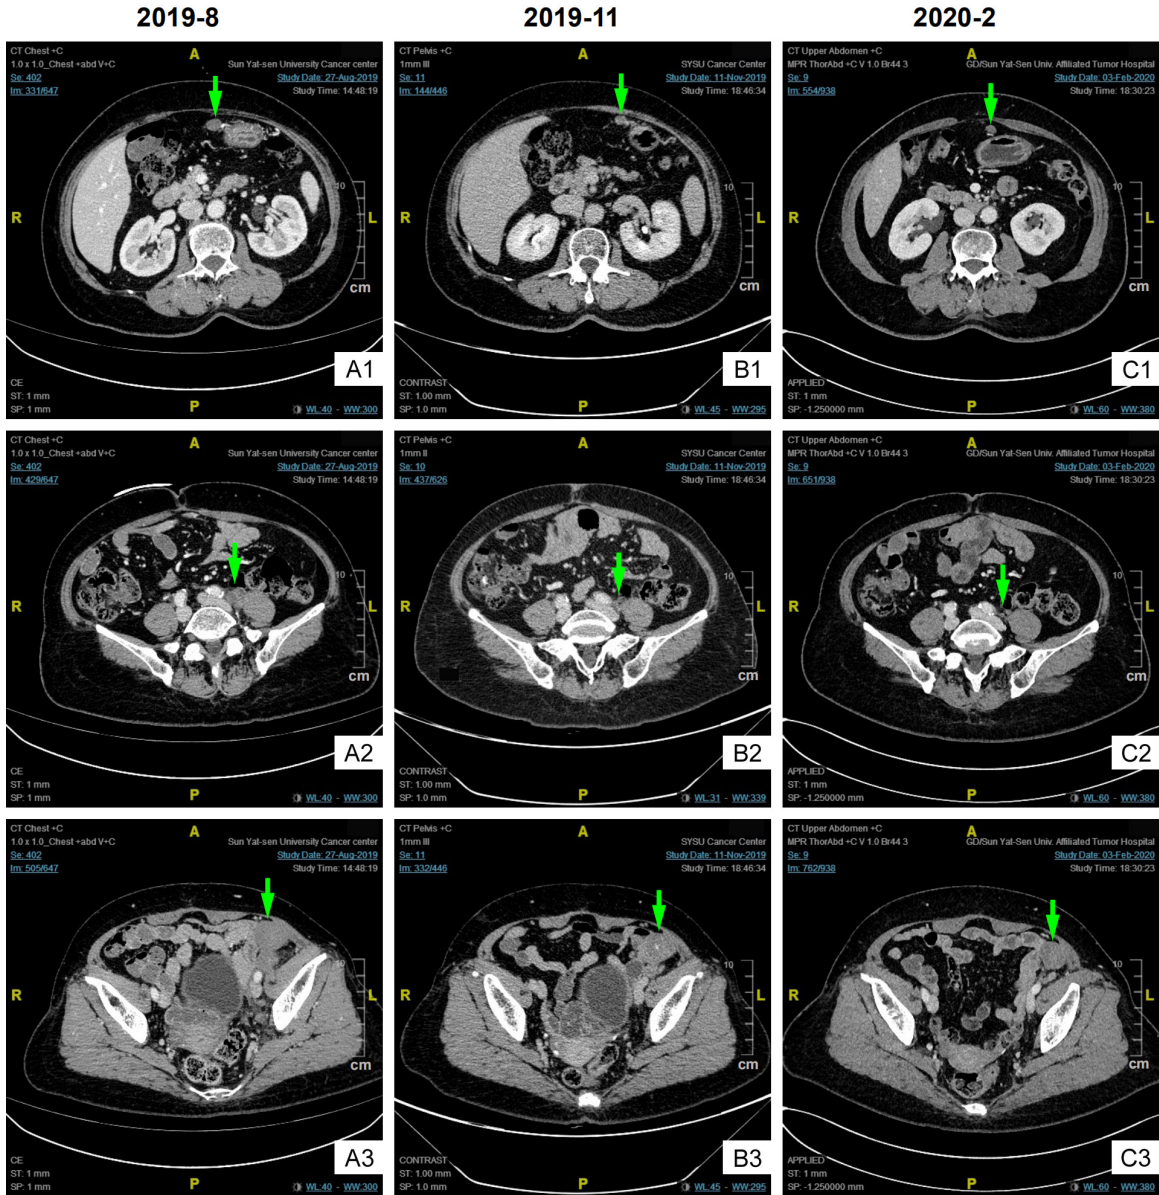

**Figure S1.** Peritoneal metastases were evaluated by contrast enhanced computed tomography from baseline to the last assessment. A1, B1, C1 showed the change of peritoneal metastasis near the abdominal wall from baseline to the last assessment. A2, B2, C2 showed the change of peritoneal metastasis near the iliac blood vessel from baseline to the last assessment. A3, B3, C3 showed the change of peritoneal metastasis in the pelvic cavity from baseline to the last assessment.
